# Supplementary material for: Satellite evidence for changes in the NO2 weekly cycle over large cities
Source: PubMed Central journal article supplement (PMC7308373; doi:10.1038/s41598-020-66891-0), 2020-06-22
Supplement: 41598_2020_66891_MOESM1_ESM.pdf [file 41598_2020_66891_MOESM1_ESM.pdf]

Table S1: Ratios of the observed NO<sub>2</sub> column on Friday, Saturday and Sunday to the weekly average for all cities with a significant minimum in OMI data (colored zone). The country codes are also provided (second column).

|               |    | OMI  |      |      | TROPOMI |      |      |
|---------------|----|------|------|------|---------|------|------|
|               |    | Fri  | Sat  | Sun  | Fri     | Sat  | Sun  |
| Abu Dhabi     | AE | 0.80 | 0.98 | 1.07 | 0.81    | 1.03 | 1.04 |
| Aleppo        | SY | 0.87 | 1.02 | 0.96 | 0.95    | 1.03 | 1.08 |
| Algiers       | DZ | 0.86 | 1.00 | 1.02 | 0.76    | 1.00 | 1.05 |
| Amman         | JO | 0.76 | 0.93 | 1.07 | 0.67    | 1.00 | 1.13 |
| Cairo         | EG | 0.84 | 0.93 | 1.06 | 0.71    | 1.05 | 1.03 |
| Damascus      | SY | 0.83 | 0.99 | 0.94 | 0.93    | 1.01 | 1.04 |
| Dammam        | SA | 0.88 | 1.01 | 1.09 | 0.81    | 0.90 | 1.01 |
| Dubai         | AE | 0.83 | 1.02 | 1.09 | 0.75    | 1.09 | 1.00 |
| Erbil         | IQ | 0.91 | 0.98 | 1.00 | 0.82    | 0.92 | 1.05 |
| Jeddah        | SA | 0.76 | 0.98 | 1.00 | 0.66    | 1.01 | 1.03 |
| Kahriz        | IR | 0.88 | 1.06 | 1.03 | 0.90    | 0.91 | 0.96 |
| Khartoum      | SD | 0.94 | 0.99 | 1.01 | 0.88    | 0.95 | 1.02 |
| Khulna        | BD | 0.89 | 1.05 | 1.03 | 1.03    | 0.97 | 0.94 |
| Mecca         | SA | 0.75 | 1.01 | 1.04 | 0.74    | 0.99 | 1.05 |
| Medina        | GH | 0.79 | 1.01 | 1.05 | 0.82    | 0.98 | 1.03 |
| Muscat        | OM | 0.84 | 0.99 | 1.05 | 0.89    | 0.93 | 1.02 |
| Riyadh        | SA | 0.80 | 1.00 | 0.98 | 0.64    | 0.95 | 1.07 |
| Sanaa         | YE | 0.86 | 0.95 | 1.01 | 0.87    | 0.97 | 1.06 |
| Tripoli       | LY | 0.83 | 0.99 | 1.04 | 0.89    | 0.96 | 1.10 |
| Birmingham    | GB | 1.08 | 0.61 | 0.63 | 1.00    | 0.96 | 0.72 |
| Jerusalem     | IL | 0.87 | 0.77 | 1.02 | 0.75    | 0.80 | 1.13 |
| Mandalay      | MM | 1.02 | 0.87 | 1.01 | 1.03    | 1.03 | 1.04 |
| Paris         | AU | 1.04 | 0.70 | 0.74 | 1.25    | 0.79 | 0.72 |
| San Francisco | US | 1.06 | 0.79 | 0.86 | 1.13    | 0.87 | 0.84 |
| Seoul         | KR | 0.99 | 0.86 | 0.88 | 1.22    | 1.04 | 0.72 |
| Zhongshan     | CN | 0.97 | 0.88 | 1.01 | 0.97    | 0.93 | 1.00 |
| Abidjan       | CI | 1.08 | 0.96 | 0.89 | 0.99    | 1.07 | 0.95 |
| Almaty        | KZ | 1.04 | 0.99 | 0.90 | 1.08    | 1.00 | 0.94 |
| Arequipa      | PE | 1.06 | 1.07 | 0.82 | 1.01    | 1.08 | 0.90 |
| Atlanta       | US | 1.14 | 0.92 | 0.80 | 0.99    | 0.88 | 0.67 |
| Austin        | US | 1.06 | 0.91 | 0.82 | 0.97    | 0.88 | 0.84 |
| Bangkok       | TH | 0.99 | 1.04 | 0.87 | 1.07    | 0.99 | 0.83 |
| Barcelona     | ES | 1.17 | 0.89 | 0.68 | 1.12    | 0.91 | 0.70 |
| Bengaluru     | IN | 0.97 | 1.00 | 0.90 | 1.09    | 0.99 | 0.90 |
| Benin City    | NG | 1.04 | 1.01 | 0.92 | 1.01    | 1.03 | 0.94 |
| Berlin        | DE | 1.09 | 0.94 | 0.73 | 1.03    | 0.93 | 0.91 |
| Brisbane      | AU | 1.05 | 0.89 | 0.76 | 1.05    | 0.82 | 0.70 |
| Brussels      | BE | 1.03 | 0.76 | 0.65 | 1.16    | 0.83 | 0.74 |
| Bucharest     | RO | 1.04 | 1.00 | 0.89 | 1.13    | 0.96 | 0.86 |
| Budapest      | HU | 1.05 | 0.94 | 0.84 | 1.09    | 0.90 | 0.78 |
| Buenos Aires  | AR | 1.18 | 0.99 | 0.76 | 1.15    | 0.88 | 0.69 |
| Bursa         | TR | 0.99 | 0.98 | 0.85 | 1.03    | 0.92 | 0.79 |
| Busan         | KR | 1.00 | 0.93 | 0.80 | 1.10    | 0.93 | 0.78 |
| Casablanca    | MA | 0.99 | 1.03 | 0.86 | 0.97    | 1.02 | 0.84 |
| Cebu City     | PH | 1.02 | 1.01 | 0.90 | 1.02    | 0.99 | 0.92 |
| Chelyabinsk   | RU | 0.98 | 1.11 | 0.80 | 1.03    | 0.95 | 0.98 |
| Chicago       | US | 1.07 | 0.92 | 0.74 | 0.95    | 0.94 | 0.74 |
| Conakry       | GN | 1.08 | 0.95 | 0.90 | 1.08    | 0.97 | 0.95 |
| Cordoba       | ES | 1.09 | 1.00 | 0.82 | 1.14    | 0.92 | 0.83 |
| Daegu         | KR | 1.07 | 0.90 | 0.78 | 1.14    | 0.99 | 0.72 |
| Dallas        | US | 1.06 | 0.89 | 0.81 | 1.01    | 0.93 | 0.77 |
| Donetsk       | RU | 1.06 | 0.99 | 0.90 | 0.92    | 0.92 | 0.91 |
| Durban        | ZA | 1.07 | 1.02 | 0.82 | 1.10    | 0.84 | 0.86 |
| Frankfurt     | DE | 1.12 | 0.91 | 0.68 | 1.03    | 1.04 | 0.79 |
| Gaziantep     | TR | 1.00 | 1.00 | 0.90 | 1.02    | 1.04 | 0.93 |
| Hamburg       | DE | 1.03 | 0.90 | 0.79 | 1.05    | 1.14 | 0.83 |

Table S1: Cont'd

|                      |    | OMI  |      |      | TROPOMI |      |      |
|----------------------|----|------|------|------|---------|------|------|
|                      |    | Fri  | Sat  | Sun  | Fri     | Sat  | Sun  |
| Jacksonville         | US | 1.06 | 0.92 | 0.83 | 1.02    | 0.88 | 0.85 |
| Johannesburg         | ZA | 1.06 | 0.94 | 0.84 | 0.99    | 0.95 | 0.73 |
| Kano                 | NG | 0.97 | 1.02 | 0.93 | 0.95    | 0.99 | 0.99 |
| Karachi              | PK | 0.98 | 1.08 | 0.85 | 1.03    | 1.21 | 0.79 |
| Kiev                 | UA | 1.01 | 0.96 | 0.88 | 1.05    | 0.95 | 0.84 |
| Kitakyushu           | JP | 1.01 | 1.04 | 0.82 | 1.04    | 0.99 | 0.98 |
| Koeln                | DE | 1.11 | 0.90 | 0.77 | 1.13    | 0.88 | 0.73 |
| Krakow               | PL | 1.11 | 0.87 | 0.80 | 1.07    | 0.97 | 0.74 |
| Lima                 | PE | 0.97 | 1.03 | 0.77 | 1.07    | 0.97 | 0.71 |
| London               | GB | 1.20 | 0.71 | 0.68 | 1.15    | 0.86 | 0.87 |
| Los Angeles          | US | 1.16 | 0.91 | 0.68 | 1.15    | 0.87 | 0.68 |
| Madrid               | ES | 1.18 | 0.78 | 0.64 | 1.16    | 0.92 | 0.66 |
| Melbourn             | CA | 1.09 | 0.71 | 0.74 | 1.23    | 0.90 | 0.62 |
| Mendoza              | AR | 1.01 | 1.01 | 0.82 | 1.08    | 0.99 | 0.80 |
| Mexico City          | MX | 1.12 | 1.05 | 0.71 | 1.18    | 1.15 | 0.65 |
| Milano               | IT | 1.14 | 0.71 | 0.66 | 1.17    | 0.90 | 0.64 |
| Montevideo           | UY | 0.90 | 1.01 | 0.86 | 1.03    | 0.86 | 0.73 |
| Montreal             | CA | 1.08 | 0.89 | 0.78 | 1.13    | 0.83 | 0.78 |
| Moscow               | RU | 1.30 | 0.93 | 0.70 | 1.12    | 1.03 | 0.76 |
| Mumbai               | IN | 1.01 | 1.04 | 0.89 | 1.00    | 1.02 | 0.97 |
| Munich               | DE | 1.08 | 0.93 | 0.69 | 1.05    | 0.95 | 0.80 |
| Nagoya               | JP | 1.04 | 0.92 | 0.68 | 1.07    | 0.96 | 0.74 |
| Napoli               | IT | 1.03 | 0.99 | 0.85 | 1.07    | 0.93 | 0.80 |
| New York             | US | 1.07 | 0.85 | 0.74 | 1.13    | 0.90 | 0.85 |
| Perm                 | RU | 1.05 | 1.02 | 0.81 | 0.85    | 0.89 | 0.97 |
| Niamey               | NE | 0.95 | 1.02 | 0.95 | 1.05    | 1.00 | 0.94 |
| Perth                | AU | 1.11 | 0.90 | 0.88 | 1.04    | 0.90 | 0.91 |
| Philadelphia         | US | 1.04 | 0.85 | 0.76 | 0.90    | 0.82 | 0.85 |
| Phoenix              | US | 1.13 | 0.90 | 0.69 | 1.06    | 0.84 | 0.72 |
| Pietermaritzburg     | ZA | 1.02 | 0.85 | 0.81 | 0.98    | 0.77 | 0.87 |
| Prague               | CZ | 1.06 | 0.93 | 0.73 | 1.13    | 0.87 | 0.84 |
| Ras Bayrut           | LB | 1.12 | 0.97 | 0.80 | 1.00    | 1.12 | 0.88 |
| Rio de Janeiro       | BR | 1.03 | 0.96 | 0.76 | 1.09    | 0.92 | 0.69 |
| Rome                 | IT | 1.04 | 0.97 | 0.78 | 1.11    | 0.97 | 0.75 |
| Rosario              | AR | 1.07 | 1.05 | 0.86 | 1.15    | 0.90 | 0.86 |
| Sakai                | JP | 1.05 | 0.87 | 0.72 | 1.01    | 0.87 | 0.66 |
| Samara               | RU | 1.12 | 0.97 | 0.89 | 1.08    | 0.91 | 0.84 |
| San Antonio          | CL | 1.01 | 0.96 | 0.85 | 1.02    | 0.87 | 0.85 |
| San Diego            | CR | 1.16 | 0.85 | 0.73 | 1.09    | 0.98 | 0.81 |
| San Jose             | PH | 1.05 | 0.85 | 0.79 | 1.15    | 0.90 | 0.76 |
| San Miguel de Tucuma | AR | 1.11 | 0.94 | 0.93 | 1.03    | 0.94 | 0.86 |
| Santiago             | CL | 1.12 | 0.93 | 0.65 | 1.24    | 0.77 | 0.60 |
| Sao Paulo            | BR | 1.12 | 0.98 | 0.62 | 1.15    | 0.79 | 0.52 |
| Sapporo              | JP | 1.17 | 0.91 | 0.75 | 1.11    | 0.95 | 0.86 |
| Seattle              | US | 1.09 | 0.88 | 0.81 | 1.08    | 0.84 | 0.72 |
| Sydney               | AU | 1.03 | 0.84 | 0.77 | 1.09    | 0.86 | 0.69 |
| Tainan               | TW | 1.05 | 0.97 | 0.84 | 1.06    | 0.97 | 0.88 |
| Tokyo                | JP | 1.04 | 0.94 | 0.65 | 0.86    | 0.95 | 0.67 |
| Toronto              | CA | 1.08 | 0.75 | 0.74 | 1.16    | 0.84 | 0.73 |
| Turin                | IT | 1.09 | 0.86 | 0.78 | 1.07    | 0.93 | 0.72 |
| Ufa                  | RU | 1.07 | 0.92 | 0.88 | 0.89    | 1.00 | 0.85 |
| Valencia             | ES | 1.02 | 1.13 | 0.90 | 1.00    | 0.91 | 0.75 |
| Vienna               | AT | 1.10 | 0.91 | 0.77 | 1.12    | 0.85 | 0.82 |
| Warsaw               | PL | 1.05 | 0.88 | 0.85 | 1.12    | 0.97 | 0.74 |
| Zagreb - Centar      | HR | 1.01 | 0.97 | 0.91 | 1.01    | 1.01 | 0.82 |
| Zibo                 | CN | 0.94 | 0.97 | 0.89 | 0.86    | 1.10 | 1.03 |

Table S2: Ratio of the rest-day column to the weekly average for cities with the most pronounced OMI NO<sub>2</sub> weekly cycle. The ratios are calculated based on annually averaged OMI (2005-2017) and TROPOMI (May 2018-April 2019) columns. The ratio based on 2005-2007 OMI data is given within parentheses. Notes: <sup>a</sup> based on GOME 1996-2001 [Beirle et al., 2003]; <sup>b</sup> based on SCIAMACHY 2003-2005 [Kaynak et al., 2009]; <sup>c</sup> uses ground-based data for 2010 [Kim et al., 2016]; <sup>d</sup> based on aircraft data for 2010 [Kim et al., 2016].

| City, Country           | OMI         | TROPOMI | previous estimates                                                            |
|-------------------------|-------------|---------|-------------------------------------------------------------------------------|
| <i>Rest day: Sunday</i> |             |         |                                                                               |
| Sao Paulo, Brazil       | 0.62 (-)    | 0.52    |                                                                               |
| Birmingham, U.K.        | 0.63 (0.49) | 0.72    |                                                                               |
| Madrid, Spain           | 0.64 (0.56) | 0.66    |                                                                               |
| Brussels, Belgium       | 0.65 (0.53) | 0.74    |                                                                               |
| Tokyo, Japan            | 0.65 (0.61) | 0.76    | 0.72 <sup>a</sup>                                                             |
| Santiago, Chile         | 0.65 (0.62) | 0.60    |                                                                               |
| Milano, Italy           | 0.66 (0.57) | 0.64    | 0.4 <sup>a</sup>                                                              |
| Los Angeles, U.S.       | 0.68 (0.56) | 0.68    | 0.52 <sup>a</sup> , 0.62 <sup>b</sup> , 0.82 <sup>c</sup> , 0.31 <sup>d</sup> |
| Nagoya, Japan           | 0.68 (0.60) | 0.74    |                                                                               |
| Frankfurt, Germany      | 0.68 (0.57) | 0.79    | 0.55 <sup>a</sup>                                                             |
| London, U.K.            | 0.68 (0.76) | 0.87    |                                                                               |
| Barcelona, Spain        | 0.68 (0.62) | 0.70    |                                                                               |
| Munich, Germany         | 0.69 (0.68) | 0.80    |                                                                               |
| Phoenix, U.S.           | 0.69 (0.63) | 0.72    | 0.50 <sup>b</sup>                                                             |
| Moscow, Russia          | 0.70 (0.76) | 0.76    |                                                                               |
| Mexico City, Mexico     | 0.71 (0.66) | 0.65    | 0.72 <sup>a</sup>                                                             |
| Osaka, Japan            | 0.73 (0.74) | 0.65    | 0.63 <sup>a</sup>                                                             |
| Prague, Czech Rep.      | 0.73 (0.73) | 0.84    |                                                                               |
| Paris, France           | 0.74 (0.66) | 0.72    | 0.63 <sup>a</sup>                                                             |
| Chicago, U.S.           | 0.74 (0.68) | 0.74    | 0.80 <sup>a</sup> , 0.60 <sup>b</sup>                                         |
| New York, U.S.          | 0.75 (0.70) | 0.83    | 0.57 <sup>a</sup> , 0.70 <sup>b</sup>                                         |
| <i>Rest day: Friday</i> |             |         |                                                                               |
| Mecca, Saudi Arabia     | 0.75 (0.78) | 0.74    | 0.82 <sup>a</sup>                                                             |
| Jeddah, Saudi Arabia    | 0.76 (0.70) | 0.66    |                                                                               |
| Amman, Jordan           | 0.76 (0.77) | 0.67    |                                                                               |
| Medina, Saudi Arabia    | 0.79 (0.80) | 0.82    |                                                                               |
| Riyadh, Saudi Arabia    | 0.80 (0.80) | 0.64    | 0.83 <sup>a</sup>                                                             |
| Abu Dhabi, U. A. Em.    | 0.80 (0.75) | 0.81    | 0.75 <sup>a</sup>                                                             |
| Dubai, U. A. Em.        | 0.83 (0.75) | 0.75    |                                                                               |
| Damascus, Syria         | 0.83 (0.78) | 0.93    |                                                                               |
| Tripoli, Libya          | 0.83 (0.89) | 0.89    |                                                                               |
| Cairo, Egypt            | 0.84 (0.77) | 0.71    | 0.90 <sup>a</sup>                                                             |

Table S3: Mean normalised NO<sub>2</sub> weekly profiles averaged over the studied cities in different countries of the world.

| Country       | M    | T    | W    | T    | F    | S    | S    |
|---------------|------|------|------|------|------|------|------|
| Arab Emirates | 1.01 | 1.06 | 1.08 | 1.04 | 0.86 | 0.92 | 1.04 |
| Saudi Arabia  | 1.02 | 1.07 | 1.05 | 1.06 | 0.79 | 1.00 | 1.01 |
| Syria         | 1.02 | 1.06 | 1.04 | 1.04 | 0.87 | 1.01 | 0.95 |
| Iraq          | 1.01 | 1.01 | 1.07 | 1.01 | 0.94 | 0.99 | 0.98 |
| Iran          | 1.03 | 1.05 | 1.06 | 0.94 | 0.90 | 1.02 | 1.00 |
| Israel        | 1.13 | 1.01 | 1.07 | 1.13 | 0.87 | 0.77 | 1.02 |
| Germany       | 1.03 | 1.04 | 1.09 | 1.09 | 1.08 | 0.93 | 0.73 |
| Spain         | 1.02 | 1.09 | 1.13 | 1.10 | 1.15 | 0.84 | 0.68 |
| Great Britain | 1.14 | 1.13 | 1.11 | 1.06 | 1.20 | 0.69 | 0.66 |
| Poland        | 1.01 | 1.03 | 1.10 | 1.04 | 1.07 | 0.90 | 0.85 |
| Greece        | 1.06 | 1.03 | 1.06 | 1.05 | 1.12 | 0.87 | 0.80 |
| Italy         | 1.01 | 1.08 | 1.07 | 1.11 | 1.08 | 0.89 | 0.77 |
| Ukraine       | 1.00 | 1.02 | 1.01 | 1.05 | 1.02 | 0.98 | 0.92 |
| Turkey        | 0.98 | 1.00 | 1.07 | 1.05 | 0.98 | 1.02 | 0.90 |
| Japan         | 1.01 | 1.08 | 1.18 | 1.05 | 1.03 | 0.94 | 0.70 |
| Korea         | 1.04 | 1.11 | 1.11 | 0.99 | 1.00 | 0.91 | 0.84 |
| China         | 1.03 | 1.01 | 0.98 | 0.99 | 0.97 | 1.06 | 0.97 |
| Taiwan        | 0.96 | 1.04 | 1.06 | 1.01 | 1.07 | 1.01 | 0.86 |
| Philippines   | 0.98 | 0.99 | 1.04 | 1.02 | 0.93 | 1.06 | 0.97 |
| Malaysia      | 1.00 | 1.04 | 1.06 | 1.00 | 0.95 | 1.02 | 0.91 |
| Vietnam       | 1.02 | 0.96 | 1.02 | 1.00 | 1.05 | 1.03 | 0.92 |
| Indonesia     | 1.07 | 1.00 | 1.06 | 1.00 | 0.99 | 0.97 | 0.91 |
| India         | 1.00 | 1.00 | 1.04 | 0.98 | 1.01 | 1.03 | 0.94 |
| Bangladesh    | 1.05 | 1.00 | 0.98 | 1.00 | 1.00 | 1.01 | 0.97 |
| Canada        | 1.10 | 1.06 | 1.09 | 1.02 | 1.07 | 0.84 | 0.81 |
| U.S.          | 1.01 | 1.06 | 1.09 | 1.09 | 1.09 | 0.89 | 0.77 |
| Argentina     | 0.93 | 1.05 | 1.07 | 1.02 | 1.16 | 0.99 | 0.77 |
| Venezuela     | 1.00 | 1.00 | 1.05 | 1.02 | 1.02 | 0.99 | 0.92 |
| Australia     | 1.03 | 1.10 | 1.09 | 1.11 | 1.06 | 0.84 | 0.77 |
| Morocco       | 1.03 | 1.00 | 1.04 | 1.01 | 0.98 | 1.03 | 0.91 |
| Guinea        | 0.98 | 1.04 | 1.09 | 0.96 | 1.08 | 0.95 | 0.90 |
| Nigeria       | 1.01 | 1.00 | 1.00 | 1.03 | 0.99 | 1.01 | 0.97 |
| South Africa  | 1.05 | 1.05 | 1.04 | 1.01 | 1.09 | 0.93 | 0.82 |

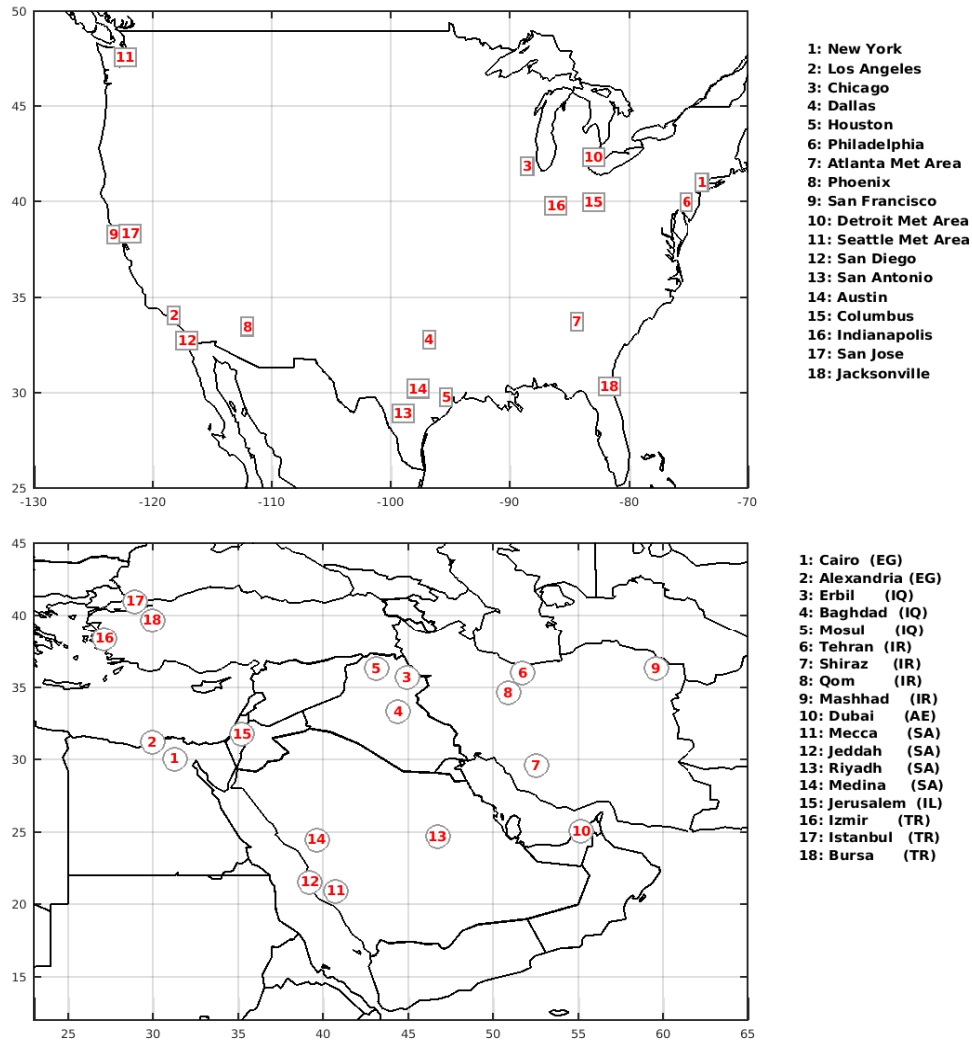

Figure S1: Location of the cities in the U.S. and the Middle East shown in Figures 4 and 6 of the main article. The administrative units are from the 2016 EUROSTAT countries dataset available in 60m resolution at <https://ec.europa.eu/eurostat/web/gisco/geodata/reference-data/administrative-units-statistical-units/countries>. The map is generated using MATLAB R2013a (8.1.0.604), Natick, Massachusetts, The Math-Works Inc.

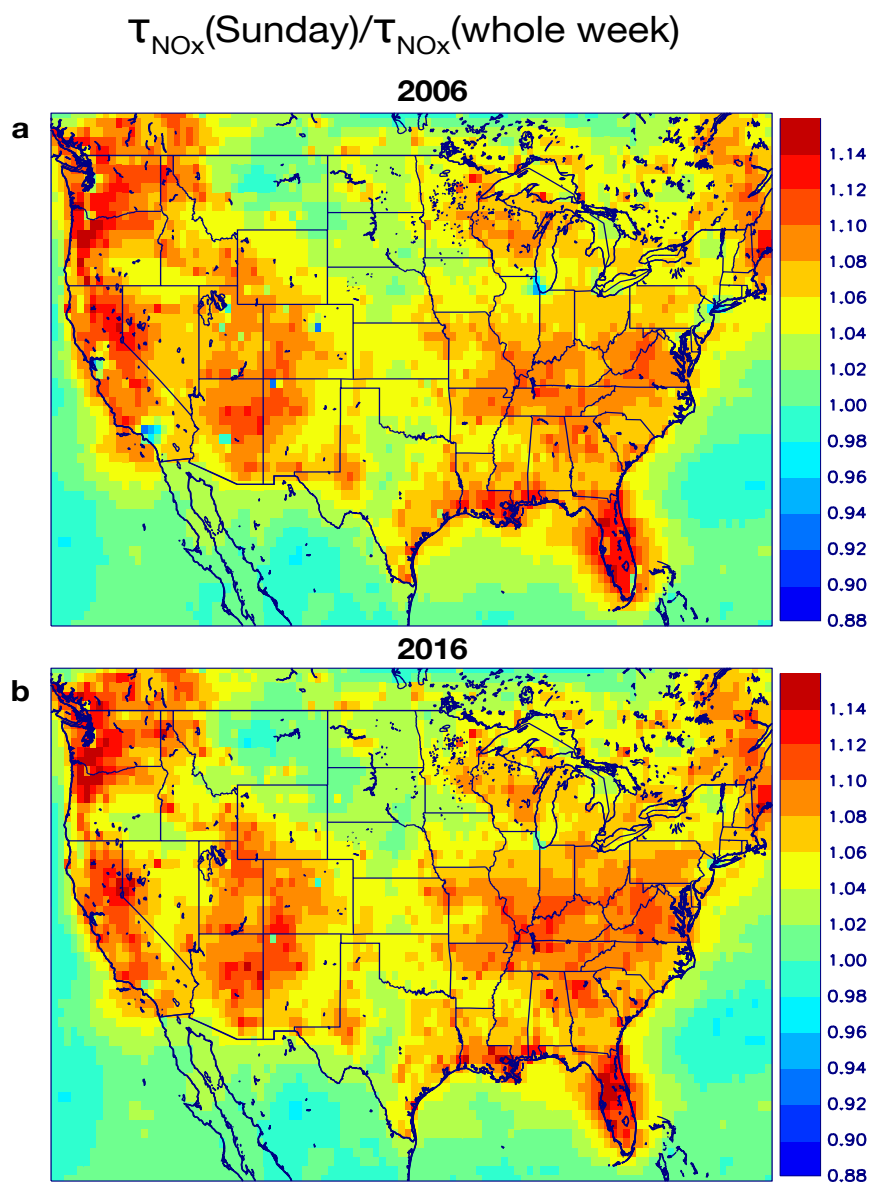

Figure S2: Ratio of the yearly averaged NO<sub>x</sub> lifetime on Sunday to the yearly averaged NO<sub>x</sub> lifetime for the whole week (a) in 2006 and (b) in 2016, as calculated by the MAGRITTE model. The same meteorological fields and natural emissions are used in both simulations, which differ only by their anthropogenic emissions.
